# Supplementary material for: Bisphenol A, S or F mother’s dermal impregnation impairs offspring immune responses in a dose and sex-specific manner in mice
Source: PubMed Central journal article supplement (PMC7813853; doi:10.1038/s41598-021-81231-6), 2021-01-18
Supplement: 41598_2021_81231_MOESM5_ESM.pdf [file 41598_2021_81231_MOESM5_ESM.pdf]

**Bisphenol A, S or F mother's dermal impregnation impairs offspring immune responses in a dose and sex-specific manner in mice**

Yann Malaisé, Corinne Lencina, Christel Cartier, Maïwenn Olier, Sandrine Ménard and Laurence Guzylack-Piriou\*

**Legend**

**Supplementary data figure**

**Supplementary Fig 1. Number of offspring mice analyzed/group of treatment.**

**Supplementary Fig 2. Effects of dermal exposure to bisphenols on Th1/Th17 cell frequency in adult offspring mice**

Flow cytometry analysis of Th1: CD3<sup>+</sup>IFN- $\gamma$ <sup>+</sup>T-bet<sup>+</sup> (A, C) or Th17: CD3<sup>+</sup>ROR $\gamma$ t<sup>+</sup>IL-17<sup>+</sup> (B, D) lymphocytes from siLP (A, B) or spleen (C, D). \* P<0.05 vs. vehicle group. N = 5-12 offspring mice per group.

**Supplementary Fig 3. Impact of dermal exposure to BPA on potent IL-17 and IFN- $\gamma$  inflammation in jejunum of adult offspring mice**

IL-17 (A) or IFN- $\gamma$  (B) in jejunal samples from female and male offspring mice at PND70. \* P<0.05 vs. vehicle group. N = 5-12 offspring mice per group.

#### **Supplementary Fig 4. PCA in vehicle group**

PCA representation (sample score plot) of gut barrier functions and immune response-associated parameters (loading plot) for control group in male and female offspring mice. Each group are shown in different color. Only loadings with correlation threshold  $>0.5$  were represented on the loading plots. % expl var: percentages for each first two components explained by the model. N = 5-12 offspring mice per group.
